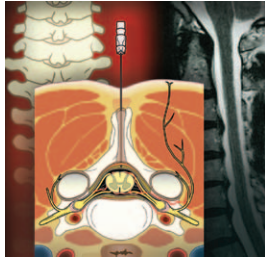

## ON THE COVER:

Cervical radicular pain is a major cause of disability and few studies have examined the role for epidural steroids in treatment. In this issue of ANESTHESIOLOGY, Cohen and his colleagues present a multicenter, randomized, comparative-effectiveness study of epidural steroid injections, conservative treatment, or combination treatment for cervical radicular pain. They demonstrate that conservative, epidural steroid, and combination treatment all produce similar reductions in arm pain. In an accompanying editorial, Rathmell discusses this and other recent trials that have clarified the proper role for epidural steroids in our pain treatment armamentarium. (Cover illustration: J. Rathmell; G. Nelson; A. Johnson, Vivo Visuals. Adapted with permission from Rathmell JP: Atlas of Image-guided Intervention, second edition. Philadelphia, Lippincott Williams & Wilkins, 2012.)

- Rathmell: The Proper Role for Epidural Injection of Corticosteroids, p. 919
- Cohen *et al.*: Epidural Steroid Injections, Conservative Treatment, or Combination Treatment for Cervical Radicular Pain: A Multicenter, Randomized, Comparative-effectiveness Study, p. 1045

|                                                                                                                                                                   |     |
|-------------------------------------------------------------------------------------------------------------------------------------------------------------------|-----|
| ◇ THIS MONTH IN ANESTHESIOLOGY                                                                                                                                    | 1A  |
| ■ SCIENCE, MEDICINE, AND THE ANESTHESIOLOGIST                                                                                                                     | 19A |
| ■ INFOGRAPHICS IN ANESTHESIOLOGY                                                                                                                                  | 21A |
| ◆ EDITORIAL VIEWS                                                                                                                                                 |     |
| <b>Perioperative Cerebral and Myocardial Ischemia and Injury in Surgical Patients Having Known Carotid Artery Stenosis</b><br><i>W.L. Lanier and W.J. Perkins</i> | 911 |
| <b>Vasopressin: The Perioperative Gift that Keeps on Giving</b><br><i>J.G.T. Augoustides and J.S. Savino</i>                                                      | 914 |
| <b>Inspiratory Muscle Activity in Neurally Adjusted Ventilatory Assist: More than Sonata for “Solo Diaphragm”</b><br><i>N. Terzi and P. Navalesi</i>              | 916 |
| <b>The Proper Role for Epidural Injection of Corticosteroids</b><br><i>J.P. Rathmell</i>                                                                          | 919 |

◇ Refers to This Month in Anesthesiology  
◆ Refers to Editorial Views

🌐 See Supplemental Digital Content  
CME CME Article

## CLINICAL SCIENCE

- ◆ ◆ **Lack of Association between Carotid Artery Stenosis and Stroke or Myocardial Injury after Noncardiac Surgery in High-risk Patients** 922  
*A. Sonny, H.L. Gornik, D. Yang, E.J. Mascha, and D.I. Sessler*  
 Of 2,110 patients who had an internal carotid duplex ultrasound performed within 6 months before or 1 month after noncardiac, noncardiac surgery, 5.3% died within 30 days of surgery and 2.6% suffered postoperative in-hospital stroke. The degree of stenosis, as measured by peak systolic velocity, was not associated with risk of stroke or myocardial injury.
- ◆ ◆ **Vasoconstrictor Responses to Vasopressor Agents in Human Pulmonary and Radial Arteries: An *In Vitro* Study** 930  
*D.A. Currigan, R.J.A. Hughes, C.E. Wright, J.A. Angus, and P.F. Soeding*  
 Sympathomimetics were potent vasoconstrictors of human radial and pulmonary arteries while vasopressin produced vasoconstriction only in radial arteries suggesting a potential advantage of vasopressin use in patients with pulmonary hypertension.
- ◆ **Prehabilitation *versus* Rehabilitation: A Randomized Control Trial in Patients Undergoing Colorectal Resection for Cancer** 937  
*C. Gillis, C. Li, L. Lee, R. Awasthi, B. Augustin, A. Gamsa, A.S. Liberman, B. Stein, P. Charlebois, L.S. Feldman, and F. Carli*  
 Two months after surgery, prehabilitated patients were able to walk significantly further in 6 min.
- Lack of Nephrotoxicity by 6% Hydroxyethyl Starch 130/0.4 during Hip Arthroplasty: A Randomized Controlled Trial** 948  
*A.S.P. Kancir, L. Pleckaitiene, T.B. Hansen, N.P. Ekeløf, and E.B. Pedersen*  
 Thirty-eight patients with normal renal function were randomly assigned to receive intraoperative infusions of 6% hydroxyethyl starch (HES) 130/0.4 or 0.9% saline during hip arthroplasty. Measurement of urinary excretion of neutrophil gelatinase-associated lipocalin and albumin as well as plasma creatinine concentrations and creatinine clearance before, during, and after surgery revealed no evidence of a harmful nephrotoxic effect of 6% HES 130/0.4 in patients with previous normal renal function.
- ◆ **Effects of Neostigmine Reversal of Nondepolarizing Neuromuscular Blocking Agents on Postoperative Respiratory Outcomes: A Prospective Study** 959  
*N. Sasaki, M.J. Meyer, S.A. Malviya, A.B. Stanislaus, T. MacDonald, M.E. Doran, A. Igemshcheva, A.H. Hoang, and M. Eikermann*  
 Three thousand patients were evaluated in a prospective observational study. Neostigmine reversal did not reduce signs and symptoms of postoperative respiratory failure and was associated with worsened atelectasis. Inappropriate use of neostigmine increased the risk of pulmonary edema and reintubation.
- Effect of Reversal of Neuromuscular Blockade with Sugammadex *versus* Usual Care on Bleeding Risk in a Randomized Study of Surgical Patients** 969  
*N. Rahe-Meyer, H. Fennema, S. Schulman, W. Klimscha, M. Przemeczek, M. Blobner, H. Wulf, M. Speck, C.M. Sisk, D. Williams-Herman, T. Woo, and A. Szegedi*  
 In a randomized double-blind trial performed in patients undergoing hip/knee surgery or hip fracture surgery (n = 1,198) and comparing sugammadex (4 mg/kg) and usual care, sugammadex induced limited (<8% at 10 min) and transient (<1 h) increases in activated partial thromboplastin time and prothrombin time but was not associated with an increased incidence of bleeding (2.9 *vs.* 4.1%; relative risk, 0.70; 95% CI, 0.38–1.29) or increased severity of bleeding.
- 🌐 **A Comparison of Propofol- and Dexmedetomidine-induced Electroencephalogram Dynamics Using Spectral and Coherence Analysis** 978  
*O. Akeju, K.J. Pavone, M.B. Westover, R. Vazquez, M.J. Prerau, P.G. Harrell, K.E. Hartnack, J. Rhee, A.L. Sampson, K. Habeeb, L. Gao, E.T. Pierce, J.L. Walsh, E.N. Brown, and P.L. Purdon*  
 Alpha oscillations are more coherent and slow oscillations show up to four-fold larger amplitude in propofol-induced unconsciousness compared with dexmedetomidine sedation. The data suggest that propofol and dexmedetomidine have specific electroencephalogram signatures that can be analyzed in real time, which would allow them to be readily interpreted by anesthesiologists.

**Effects of Sevoflurane and Propofol on Frontal Electroencephalogram Power and Coherence** 990

*O. Akeju, M.B. Westover, K.J. Pavone, A.L. Sampson, K.E. Hartnack, E.N. Brown, and P.L. Purdon*

Both propofol and sevoflurane anesthesia were characterized by alpha oscillations with coherence at 10 Hz and slow oscillations at less than 1 Hz, suggesting a common system-level mechanism with unconsciousness. Unlike propofol, sevoflurane was associated with increased power and coherence in the theta range. Whether this electroencephalogram pattern is unique to sevoflurane anesthesia remains to be determined.

## BASIC SCIENCE

**Distinctive Recruitment of Endogenous Sleep-promoting Neurons by Volatile Anesthetics and a Nonimmobilizer** 999

*B. Han, H.S. McCarren, D. O'Neill, and M.B. Kelz*

Within the ventrolateral preoptic area, volatile anesthetics increased activation of  $\gamma$ -aminobutyric acidergic neurons. In the median preoptic area, neuronal activation was independent of hypnosis. Anesthetics do not activate all neurons that regulate sleep, nor do they universally recruit all sleep-promoting neural nuclei.

**Endocrine and Neurobehavioral Abnormalities Induced by Propofol Administered to Neonatal Rats** 1010

*S. Tan, C. Xu, W. Zhu, J. Willis, C.N. Seubert, N. Gravenstein, C. Summers, and A.E. Martynyuk*

Propofol, administered to neonatal rats, caused an increase in corticosterone levels immediately after anesthesia and induced behavioral abnormalities and exacerbated endocrine activity at rest in response to stress in adulthood. Increased corticosteroid levels in adulthood were observed in both male and female rodents, but behavioral abnormalities were observed in only male rodents. Findings suggest that propofol-caused increases in levels of corticosteroids and excitatory action of  $\gamma$ -aminobutyric acid at the time of anesthesia may play mechanistic roles in induction of long-term endocrine and behavioral abnormalities in adulthood.

**Crystallographic Studies with Xenon and Nitrous Oxide Provide Evidence for Protein-dependent Processes in the Mechanisms of General Anesthesia** 1018

*J.H. Abraini, G. Marassio, H.N. David, B. Vallone, T. Prangé, and N. Colloc'h*

Crystallographic studies of 10 binding sites in 4 proteins found that the binding of xenon and nitrous oxide do not depend on hydrophobicity alone but on complex processes in which hydrophobicity and volume interact in different ways. Gas, including general anesthetic, binding to proteins should be considered to be due to a fully reversible interaction between a ligand and a receptor.

## ■ CRITICAL CARE MEDICINE

## CLINICAL SCIENCE

**Increased Diaphragmatic Contribution to Inspiratory Effort during Neurally Adjusted Ventilatory Assistance *versus* Pressure Support: An Electromyographic Study** 1028

*J. Cecchini, M. Schmidt, A. Demoule, and T. Similowski*

Increasing levels of pressure support ventilation or neurally adjusted ventilatory assist both reduced diaphragmatic electromyographic activity and the inspiratory activity of the scalene and *alae nasi* muscles. Compared with pressure support ventilation, neurally adjusted ventilatory assist led to a larger contribution of the diaphragm to inspiratory efforts.

**Pupillary Effects of High-dose Opioid Quantified with Infrared Pupillometry** 1037

*M.D. Rollins, J.R. Feiner, J.M. Lee, S. Shah, and M. Larson*

In 10 volunteers administered remifentanyl to the point of clinically significant hypercarbia and hypoxemia, there was evidence of a robust quantifiable light reflex despite small pupil size. These results suggest that the pupillary light reflex remains a valid neurologic assessment in the presence of opioids and hypoventilation.

# CONTENTS

## ■ PAIN MEDICINE

### CLINICAL SCIENCE

- ◆ ◆ **Epidural Steroid Injections, Conservative Treatment, or Combination Treatment for Cervical Radicular Pain: A Multicenter, Randomized, Comparative-effectiveness Study** 1045  
*S.P. Cohen, S. Hayek, Y. Semenov, P.F. Pasquina, R.L. White, E. Veizi, J.H.Y. Huang, C. Kurihara, Z. Zhao, K.B. Guthmiller, S.R. Griffith, A.V. Verdun, D.M. Giampetro, and Y. Vorobeychik*

This randomized study suggests that conservative, epidural steroid, and combination treatment may all produce similar outcomes in terms of reduction in arm pain. Combination treatment may offer some advantages for other outcomes such as neck and arm pain.

### BASIC SCIENCE

- Modeling Individual Recovery after Peripheral Nerve Injury in Rats and the Effects of Parturition** 1056  
*C.A. Aschenbrenner, T.T. Houle, S. Gutierrez, and J.C. Eisenach*

The authors demonstrate a method to measure recovery from pain-related responses after nerve injury. Using this methodology, sex differences were not evident but enhanced recovery was observed in postpartum rats.

- Calcitonin Gene-related Peptide Is Involved in Inflammatory Pain but Not in Postoperative Pain** 1068  
*K. Ishida, T. Kawamata, S. Tanaka, T. Shindo, and M. Kawamata*

Mice deficient in the  $\alpha$  isoform of calcitonin gene-related peptide display reduced pain-related behaviors after the injection of complete Freund's adjuvant. No calcitonin gene-related peptide-related differences were observed after incision. Calcitonin gene-related peptide-deficient mice also had reduced spinal cord Fos expression after complete Freund's adjuvant injection. These data distinguish incision- and inflammation-related pain on a biochemical level.

- AMPAkines Have Novel Analgesic Properties in Rat Models of Persistent Neuropathic and Inflammatory Pain** 1080  
*A.M. Le, M. Lee, C. Su, A. Zou, and J. Wang*

Surprisingly, AMPAkines reduced mechanical and cold allodynia and attenuated symptoms of depression associated with chronic pain. Given the combination of analgesia and reduction of opioid-induced hypoventilation, AMPAkines may find utility in the treatment of persistent postoperative and chronic pain.

## ■ EDUCATION

### IMAGES IN ANESTHESIOLOGY

- Pediatric Tongue Injury after Transesophageal Echocardiography for Cardiac Transplantation** 1091  
*M.D. Fritock, L.G. Segura, and C.F. Viozzi*

- 🌐 **Laryngeal Papillomatosis** 1092  
*L.R. Kelly Ugarte and C. Munoz-San Julian*

### CLINICAL CONCEPTS AND COMMENTARY

- 📄 ◆ **Perioperative Management of the Patient with a Coronary Artery Stent** 1093  
*T.R. Vetter, R.T. Short III, M.T. Hawn, and M.B. Marques*

The need for the preoperative continuation of chronic antiplatelet therapy with coronary artery stents can be challenging and remains controversial.

# CONTENTS

## REVIEW ARTICLE

- ◇  **Cell-based Therapy for Acute Organ Injury: Preclinical Evidence and Ongoing Clinical Trials Using Mesenchymal Stem Cells** 1099

*A. Monsel, Y.-g. Zhu, S. Gennai, Q. Hao, J. Liu, and J.W. Lee*

There are currently more than 350 clinical trials utilizing the adult stem cell, mesenchymal stem or stromal cells. The review summarizes the underlying rationale and preclinical studies using mesenchymal stem cells for acute organ injury.

## MIND TO MIND

- Why?** 1122

*K.E. McGoldrick*

- Call Nights** 1124

*I.H. Black*

- Reflections from Armenia** 1126

*V.S. Tateosian*

## ■ CORRESPONDENCE

- Etomidate and Treatment Propensity** 1128

*R.D. Sanders, T. Pickworth, G. Okoli, S. Venkatesan, and P. Myles*

**In Reply**

*J.S. Schildcrout, X. Han, J.M. Ehrenfeld, C.E. Wagner, and M. Pretorius*

- 
- Total Local Anesthetic Administered Is Integral to the Syndrome of Local Anesthetic Systemic Toxicity** 1130

*S. Petrar and T. Montemurro*

- Did Preoperative Fixation on Choice of Anesthetic Confound Assessment of Alternative Techniques?**

*M.J. Barrington and G.L. Weinberg*

**In Reply**

*M.G. Vadi, N. Patel, and M.P. Stiegler*

## ■ REVIEWS OF EDUCATIONAL MATERIAL

1133

## ■ CAREERS & EVENTS

25A

## INSTRUCTIONS FOR AUTHORS

The most recently updated version of the Instructions for Authors is available at [www.anesthesiology.org](http://www.anesthesiology.org). Please refer to the Instructions for the preparation of any material for submission to ANESTHESIOLOGY.

Manuscripts submitted for consideration for publication must be submitted in electronic format. The preferred method is via the Journal's Web site (<http://www.anesthesiology.org>). Detailed directions for submissions and the most recent version of the Instructions for Authors can be found on the Web site (<http://www.anesthesiology.org>). Books and educational materials should be sent to Michael J. Avram, Ph.D., Diplomate, ABCP, Associate Professor of Anesthesiology, Director, Mary Beth Donnelley Clinical Pharmacology Core Facility of the Robert H. Lurie Comprehensive Cancer Center, Northwestern University Feinberg School of Medicine, 300 E. Superior Street, Tarry 4-735, Chicago, Illinois 60611. Requests for permission to duplicate materials published in ANESTHESIOLOGY should be submitted in electronic format, to the Permissions Department ([journalpermissions@lww.com](mailto:journalpermissions@lww.com)). Advertising and related correspondence should be addressed to Advertising Manager, ANESTHESIOLOGY, Lippincott Williams & Wilkins, Two Commerce Square, 2001 Market Street, Philadelphia, Pennsylvania 19103 (Web site: <http://www.wkadcenter.com/>). Publication of an advertisement in ANESTHESIOLOGY does not constitute endorsement by the Society or Lippincott Williams & Wilkins, Inc. of the product or service described therein or of any representations made by the advertiser with respect to the product or service.

**ANESTHESIOLOGY** (ISSN 0003-3022) is published monthly by Lippincott Williams & Wilkins, 16522 Hunters Green Parkway, Hagerstown, MD 21740-2116. Business office: Two Commerce Square, 2001 Market Street, Philadelphia, PA 19103. Periodicals postage paid at Hagerstown, MD, and at additional mailing offices. Copyright © 2014, the American Society of Anesthesiologists, Inc.

**Annual Subscription Rates:** *United States*—\$758 Individual, \$1431 Institution, \$304 In-training. *Rest of World*—\$800 Individual, \$1589 Institution, \$304 In-training. Single copy rate \$132. Subscriptions outside of North America must add \$52 for airfreight delivery. Add state sales tax, where applicable. The GST tax of 7% must be added to all orders shipped to Canada (Lippincott Williams & Wilkins' GST Identification #895524239, Publications Mail Agreement #1119672). Indicate in-training status and name of institution. Institution rates apply to libraries, hospitals, corporations, and partnerships of three or more individuals. Subscription prices outside the United States must be prepaid. Prices subject to change without notice. Subscriptions will begin with currently available issue unless otherwise requested. Visit us online at [www.lww.com](http://www.lww.com).

Individual and in-training subscription rates include print and access to the online version. Online-only subscriptions for individuals (\$257) and persons in training (\$257) are available to nonmembers and may be ordered by downloading a copy of the Online Subscription FAXback Form from the Web site, completing the information requested, and faxing the completed form to 301-223-2400/44 (0) 20 7981 0535. Institutional rates are for print only; online subscriptions are available via Ovid. Institutions can choose to purchase a print and online subscription together for a discounted rate. Institutions that wish to purchase a print subscription, please contact Lippincott Williams & Wilkins, 16522 Hunters Green Parkway, Hagerstown, MD 21740-2116; phone: 1-800-638-3030 (outside the United States 301-223-2300/44 (0) 20 7981 0525); fax: 301-223-2400/44 (0) 20 7981 0535. Institutions that wish to purchase an online subscription or online with print, please contact the Ovid Regional Sales Office near you or visit [www.ovid.com/site/index.jsp](http://www.ovid.com/site/index.jsp) and select Contact and Locations.

**Address for non-member subscription information, orders, or change of address:** Lippincott Williams & Wilkins, 16522 Hunters Green Parkway, Hagerstown, MD 21740-2116; phone: 1-800-638-3030 (outside the United States 301-223-2300/44 (0) 20 7981 0525); fax: 301-223-2400/44 (0) 20 7981 0535; email: [customerservice@lww.com](mailto:customerservice@lww.com). In Japan, contact LWW Japan Ltd., 3-23-14 Hongo, Bunkyo-ku, Tokyo 113, Japan; phone: 81-3-5689-5400; fax: 81-3-5689-5402; email: [bclaim@lwwis.co.jp](mailto:bclaim@lwwis.co.jp). In Bangladesh, India, Nepal, Pakistan, and Sri Lanka, contact Globe Publications Pvt. Ltd., B-13 3rd Floor, A Block, Shopping Complex, Naraina, Vihar, Ring Road, New Delhi 110028, India; phone: 91-11-25770411; fax: 91-11-25778876; email: [info@globepub.com](mailto:info@globepub.com).

**Address for member subscription information, orders, or change of address:** Members of the American Society of Anesthesiologists receive the print and online journal with their membership. To become a member or provide a change of address, please contact the American Society of Anesthesiologists, 520 N. Northwest Highway, Park Ridge, IL 60068-2573; phone: 847-825-5586; fax: 847-825-1692; email: [membership@ASAhq.org](mailto:membership@ASAhq.org). For all other membership inquiries, contact Lippincott Williams & Wilkins Customer Service Department, P.O. Box 1580, Hagerstown, MD 21741-1580; phone: 1-800-638-3030 (outside the United States 301-223-2300/44 (0) 20 7981 0525); fax: 301-223-2400/44 (0) 20 7981 0535; email: [memberservice@lww.com](mailto:memberservice@lww.com).

**Postmaster:** Send address changes to ANESTHESIOLOGY, P.O. BOX 1550, Hagerstown, MD 21740.

**Advertising:** Please contact Michelle Smith, Senior Account Manager, Advertising, Lippincott Williams & Wilkins, 333 Seventh Avenue, 19th Floor, New York, NY 10001; tel: (646) 674-6537, fax: (646) 607-5479, e-mail: [Michelle.Smith@wolterskluwer.com](mailto:Michelle.Smith@wolterskluwer.com). For classified advertising: Keida Spurlock, Recruitment Advertising Representative, Lippincott Williams & Wilkins, Two Commerce Square, 2001 Market Street, Philadelphia, PA 19103; tel: (215) 521-8501, fax: (215) 689-2453. e-mail: [Keida.Spurlock@wolterskluwer.com](mailto:Keida.Spurlock@wolterskluwer.com).
